# Supplementary material
Source: publisher site journal article supplement (https://www.dovepress.com/article/286503)
Supplement: Supplementary file 1 [file get_supplementary_file.php]

Figure S1 Diagram of study training cohort selection step.


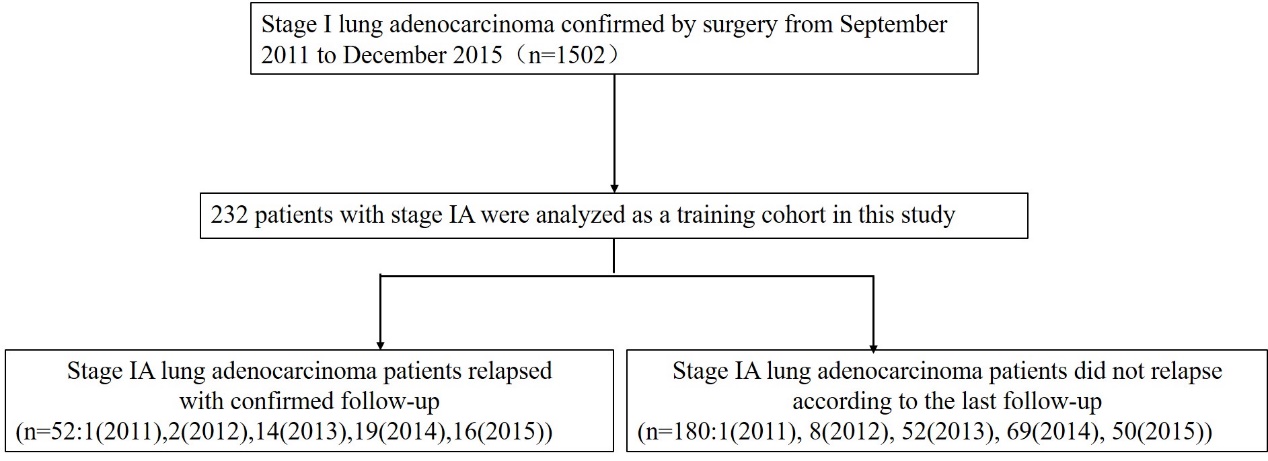


Table S1 Point assignment of prognostic model

| Variable | Points |
| --- | --- |
| Tumor differentiation |  |
| High differentiation | 0 |
| High-middle differentiation | 35 |
| Middle differentiation | 31 |
| Middle-low differentiation | 52 |
| Low differentiation | 58 |
| Unknown | 24 |
| EGFR mutation |  |
| No | 93 |
| EGFR 19del | 100 |
| EGFR 21L858R | 77 |
| Unknown | 0 |

Table S2 1-year, 3-year and 5-year DFS rate in different risk groups stratified by nomogram in training and validation cohorts

|  | Training cohort | | | Validation cohort | | |
| --- | --- | --- | --- | --- | --- | --- |
|  | Low-risk group | Middle-risk group | High-risk group | Low-risk group | Middle-risk group | High-risk group |
| 1-year DFS rate (%) | 100.0 | 97.9 | 71.4 | 100.0 | 100.0 | 100.0 |
| 3-year DFS rate (%) | 98.1 | 84.3 | 21.8 | 100.0 | 98.2 | 87.5 |
| 5-year DFS rate (%) | 98.1 | 78.2 | 10.9 | 100.0 | 98.2 | 83.3 |
